# Supplementary material for: Comment on “Crystal growth and aggregation in suspensions of δ-MnO2 nanoparticles: implications for surface reactivity” by F. F. Marafatto, B. Lanson and J. Peña, Environ. Sci.: Nano, 2018, 5, 497
Source: Royal Society of Chemistry journal article supplement (doi:10.1039/c8en00126j), 2018-01-01
Supplement: c8en00126j1.pdf [file c8en00126j1.pdf]

## Supplementary Information

**Comment on "Crystal growth and aggregation in suspensions of  $\delta$ -MnO<sub>2</sub> nanoparticles: implications for surface reactivity" by F. F. Marafatto, B. Lanson and J. Peña, *Environ. Sci.: Nano*, 2018, 5, 497**

Alain Manceau

Univ. Grenoble Alpes, CNRS, ISTERre, F-38000 Grenoble, France

**Table S1.** Atomic coordinates and site occupancies used to calculate the XRD profiles and to fit the  $\delta$ -MnO<sub>2</sub> sample pattern from Fig. 3A. Same conventions as in Table 3 from Ref. <sup>18</sup>.

| Atom                   | Coordinates |        |      | Occupancy |
|------------------------|-------------|--------|------|-----------|
|                        | x           | y      | z    |           |
| <sup>E</sup> Mn (Mn1)  | 0           | 0      | 0    | 0.90      |
| O <sub>Mn1</sub>       | 0.333       | 0      | 0.14 | 2.0       |
| <sup>TC</sup> Mn (Mn2) | 0           | 0      | 0.29 | 0.05      |
| O <sub>Mn2</sub>       | -0.333      | 0      | 0.45 | 0.15      |
| Interlayer Na          | -0.540      | 0      | 0.5  | 0.083     |
|                        | -0.230      | 0.310  | 0.5  | 0.083     |
|                        | -0.230      | -0.310 | 0.5  | 0.083     |
| Interlayer Water       | 0.120       | 0      | 0.5  | 0.083     |
|                        | -0.06       | 0.18   | 0.5  | 0.083     |
|                        | -0.06       | -0.18  | 0.5  | 0.083     |

$a = 4.919 \text{ \AA}$ ;  $b = 2.84 \text{ \AA}$ ;  $c = 7.20 \text{ \AA}$ ,  $\alpha = \beta = \gamma = 90^\circ$ . Debye–Waller factors B ( $\text{\AA}^2$ ) were fixed to 0.5 for Mn1, 1.0 for O1 and Mn2, and 2.0 for all other atoms

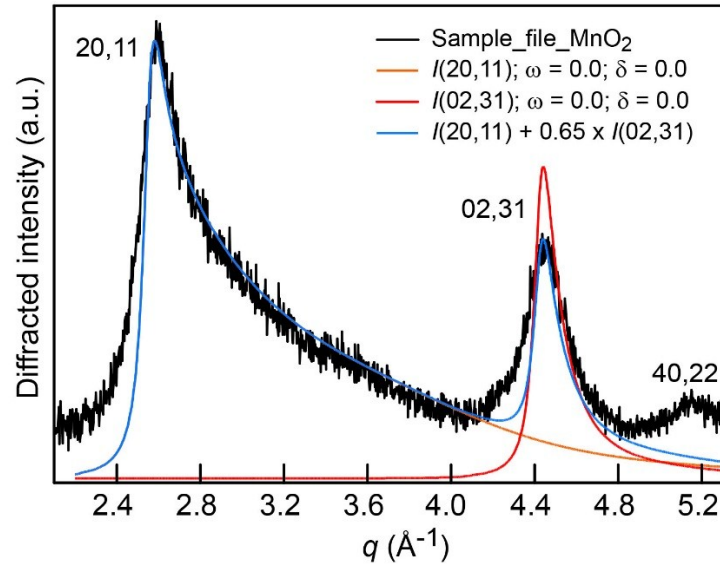

**Fig. S1.** Reconstruction of the  $\delta$ -MnO<sub>2</sub> pattern shown in Fig. 3A by adding the 20,11 and 02,31 line profiles calculated separately and without considering microstrain resulting from particle bending. In this way, the strain effect in the pattern apparently can be reproduced by (1) adjusting the calculated  $I(20,11) / I(02,31)$  ratio to  $I(20,11) / [0.65 \times I(02,31)]$ , and (2) increasing the width of the 02,31 line, i.e., changing the CSD dimension (not shown in the Figure).
